# Supplementary material for: The Identification of Subphenotypes and Associations with Health Outcomes in Patients with Opioid-Related Emergency Department Encounters Using Latent Class Analysis
Source: MDPI journal article supplement (doi:10.3390/ijerph19148882), 2022-07-21
Supplement: s1 [file s1]

**Table S1.** ICD-10-CM diagnosis codes defining opioid-related encounters.

| Type of opioid-related condition | ICD-10-CM diagnosis codes                                                                                                                                                                                                                                                                                                                                                                                                                                                                                                                                                                                                                                                                                                                                                                                       |
|----------------------------------|-----------------------------------------------------------------------------------------------------------------------------------------------------------------------------------------------------------------------------------------------------------------------------------------------------------------------------------------------------------------------------------------------------------------------------------------------------------------------------------------------------------------------------------------------------------------------------------------------------------------------------------------------------------------------------------------------------------------------------------------------------------------------------------------------------------------|
| Abuse or dependence              | F11 series: Opioid-related disorders (except F11.21)                                                                                                                                                                                                                                                                                                                                                                                                                                                                                                                                                                                                                                                                                                                                                            |
| Adverse event                    | T40.0X5: Adverse effect of opium<br>T40.2X5: Adverse effect of other opioids<br>T40.3X5: Adverse effect of methadone<br>T40.4X5: Adverse effect of other synthetic narcotics<br>T40.605: Adverse effect of unspecified narcotics<br>T40.695: Adverse effect of other narcotics                                                                                                                                                                                                                                                                                                                                                                                                                                                                                                                                  |
| Poisoning, including self-harm   | T40.0X1, 0X2, 0X3, 0X4: Poisoning by opium—accidental, intentional self-harm, assault, or undetermined<br>T40.1X1, 1X2, 1X3, 1X4: Poisoning by heroin—accidental, intentional self-harm, assault, or undetermined<br>T40.2X1, 2X2, 2X3, 2X4: Poisoning by other opioids—accidental, intentional self-harm, assault, or undetermined<br>T40.3X1, 3X2, 3X3, 3X4: Poisoning by methadone—accidental, intentional self-harm, assault, or undetermined<br>T40.4X1, 4X2, 4X3, 4X4: Poisoning by other synthetic narcotics—accidental, intentional self-harm, assault, or undetermined<br>T40.601–T40.604: Poisoning by unspecified narcotics—accidental, intentional self-harm, assault, or undetermined<br>T40.691–T40.694: Poisoning by other narcotics—accidental, intentional self-harm, assault, or undetermined |
