# Supplementary material for: The Identification of Subphenotypes and Associations with Health Outcomes in Patients with Opioid-Related Emergency Department Encounters Using Latent Class Analysis
Source: MDPI journal article supplement (doi:10.3390/ijerph19148882), 2022-07-21
Supplement: s1 [file s1]

**Table S4.** Patient characteristics odds ratios by latent class.

|                          | Class 1<br>Chronic Pain | Class 2<br>Alcohol Use | Class 3<br>Depression &<br>Pain | Class 4<br>Psychosis,<br>Liver Disease,<br>&<br>Polysubstance<br>Use | Class 5<br>Pregnancy |
|--------------------------|-------------------------|------------------------|---------------------------------|----------------------------------------------------------------------|----------------------|
| Age                      | ref                     | 1.00                   | 1.00                            | 1.00                                                                 | 0.92                 |
| Sex                      |                         |                        |                                 |                                                                      |                      |
| Female                   | ref                     | 0.29                   | 1.44                            | 0.53                                                                 | N/A                  |
| Male                     |                         |                        |                                 |                                                                      |                      |
| Payer                    |                         |                        |                                 |                                                                      |                      |
| Medicare                 | ref                     | ref                    | ref                             | ref                                                                  | ref                  |
| Medicaid                 | ref                     | 2.07                   | 0.70                            | 1.19                                                                 | 50                   |
| Private                  | ref                     | 1.28                   | 0.60                            | 0.59                                                                 | 33.33                |
| Self-pay                 | ref                     | 2.49                   | 0.40                            | 1.05                                                                 | 20                   |
| No charge                | ref                     | 3.98                   | 0.48                            | 1.43                                                                 | 25                   |
| Other                    | ref                     | 1.34                   | 0.45                            | 0.59                                                                 | 20                   |
| Median income            |                         |                        |                                 |                                                                      |                      |
| Top quartile             | ref                     | ref                    | ref                             | ref                                                                  | ref                  |
| 2 <sup>nd</sup> quartile | ref                     | 0.97                   | 1.12                            | 0.89                                                                 | 0.91                 |
| 3 <sup>rd</sup> quartile | ref                     | 1.13                   | 1.24                            | 0.93                                                                 | 0.88                 |
| 4 <sup>th</sup> quartile | ref                     | 1.45                   | 1.40                            | 1.00                                                                 | 0.79                 |
| Urbanicity               |                         |                        |                                 |                                                                      |                      |
| Central metropolitan     | ref                     | ref                    | ref                             | ref                                                                  | ref                  |
| Fringe metropolitan      | ref                     | 0.94                   | 1.25                            | 0.85                                                                 | 0.72                 |
| 250-999K                 | ref                     | 0.80                   | 1.29                            | 0.79                                                                 | 0.66                 |
| 50-250K                  | ref                     | 0.80                   | 1.15                            | 0.70                                                                 | 0.57                 |
| Micropolitan             | ref                     | 0.61                   | 1.20                            | 0.65                                                                 | 0.53                 |
| Non-core                 | ref                     | 0.56                   | 1.09                            | 0.61                                                                 | 0.49                 |
