# Supplementary figures and images for: The Identification of Subphenotypes and Associations with Health Outcomes in Patients with Opioid-Related Emergency Department Encounters Using Latent Class Analysis
Source: MDPI journal article supplement (doi:10.3390/ijerph19148882), 2022-07-21

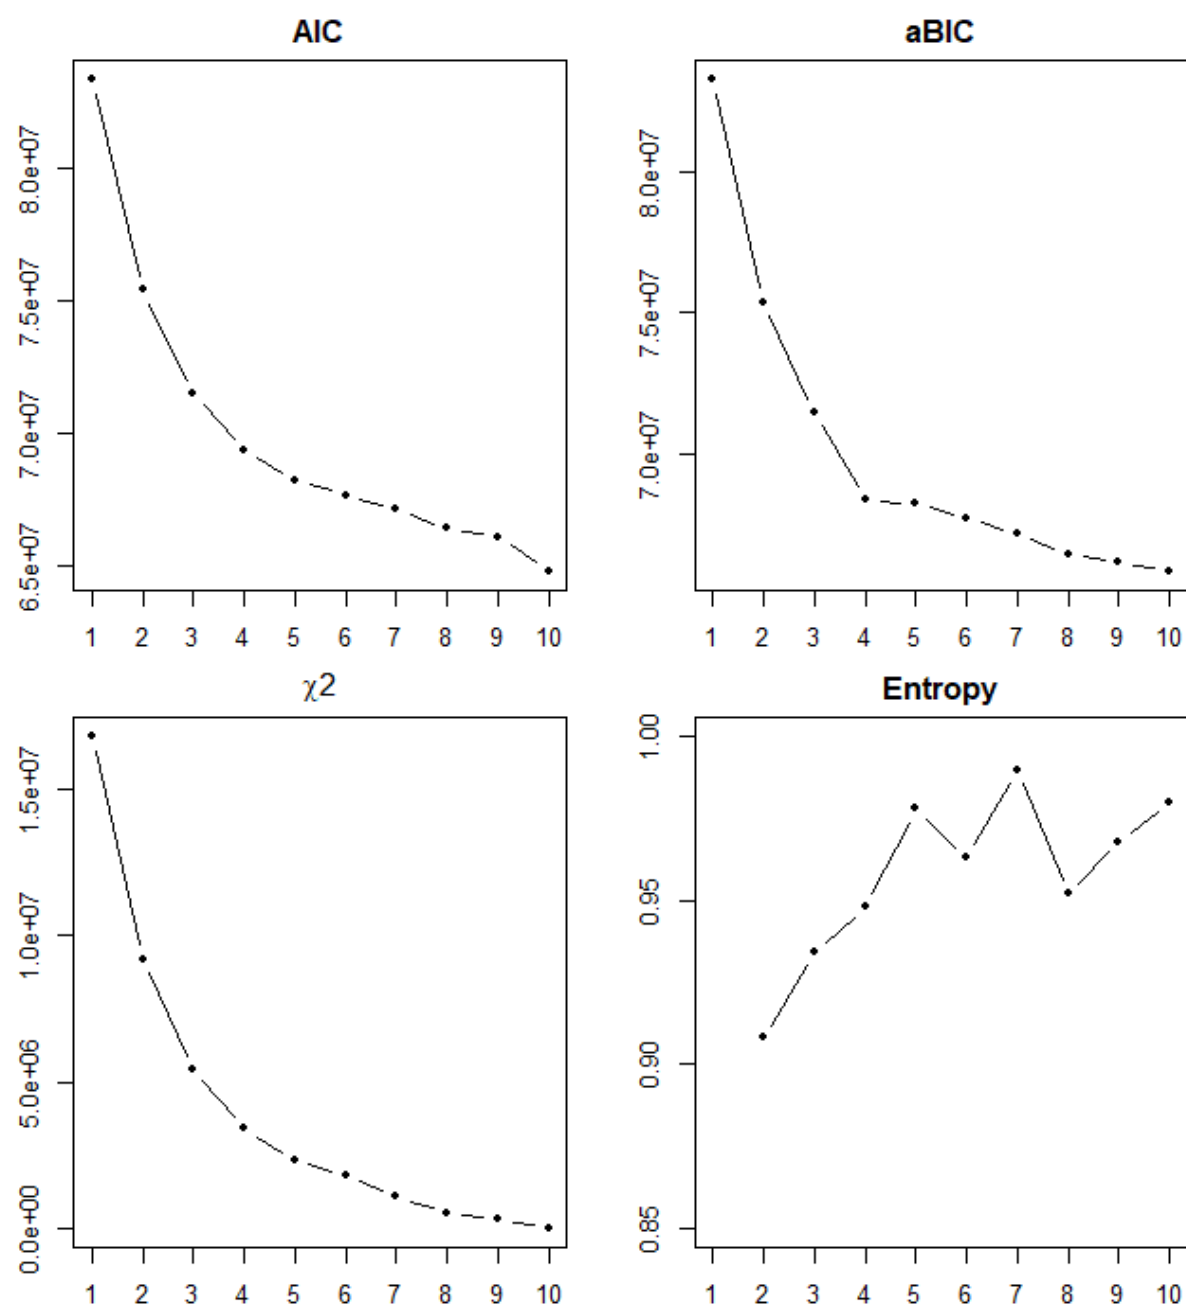

**Figure S1.** Information criteria-based metrics by number of classes in model.

Supplement: s1 [file s1]
